# Supplementary material for: A chitosan–polypyrrole@Fe3O4nanocomposite for magnetic solid-phase extraction of macrolides from swine urine samples
Source: Royal Society of Chemistry journal article supplement (doi:10.1039/c4ay02907k), 2015-01-01
Supplement: c4ay02907k1.pdf [file c4ay02907k1.pdf]

1  
2  
3  
4  
5

## Supplemental Information

### Chitosan– polypyrrole @ Fe<sub>3</sub>O<sub>4</sub> nanocomposite for magnetic solid-phase extraction of macrolides from swine urine samples

Qie Gen Liao, Li Fang Hu and Lin Guang Luo\*

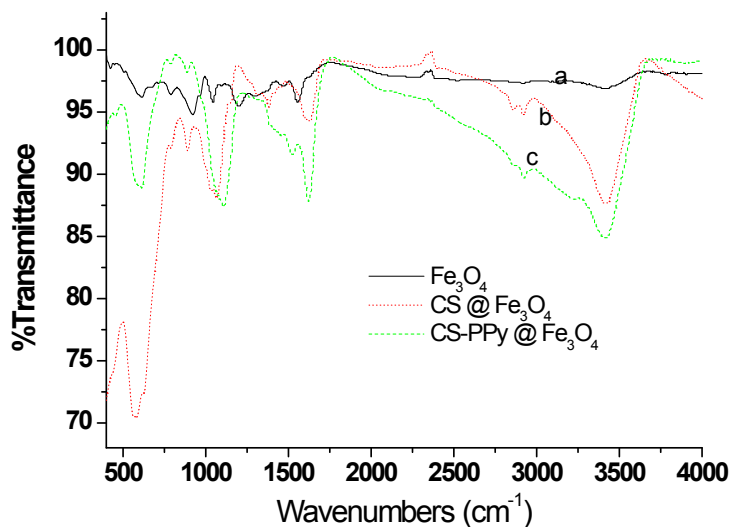

6  
7  
8  
9  
10  
11  
12  
13

**Fig. S1** The FTIR spectra of Fe<sub>3</sub>O<sub>4</sub>, CS @ Fe<sub>3</sub>O<sub>4</sub> and CS-PPy @ Fe<sub>3</sub>O<sub>4</sub> magnetic nanocomposite

---

Laboratory of quality & safety risk assessment of livestock and poultry products (Nanchang), Ministry of agriculture, Agricultural product quality safety and standards institute, Jiangxi academy of agricultural sciences, Nanchang, 330200, P R China

E-mail: luolinguang2014@163.com.

14  
15  
16  
17  
18  
19

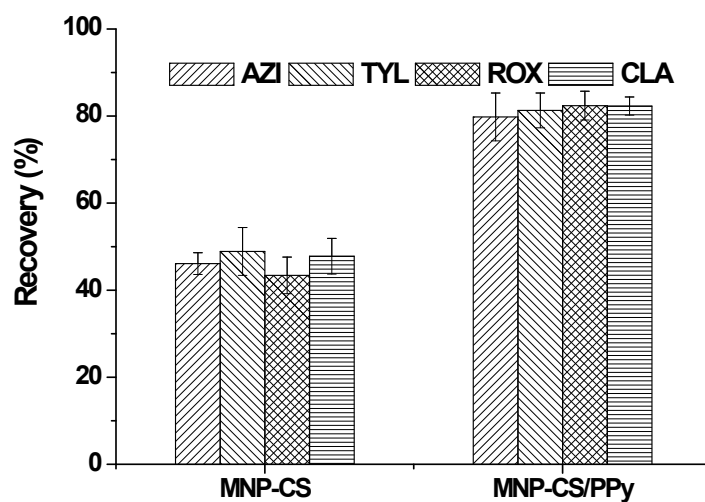

20  
21  
22  
23  
24  
25  
26  
27  
28  
29  
30  
31

**Fig. S2** Effect of different adsorbent on the recoveries of macrolides.

32  
33  
34  
35  
36  
37  
38  
39  
40  
41  
42  
43  
44  
45  
46  
47  
48  
49  
50  
51  
52  
53  
54  
55  
56  
57  
58

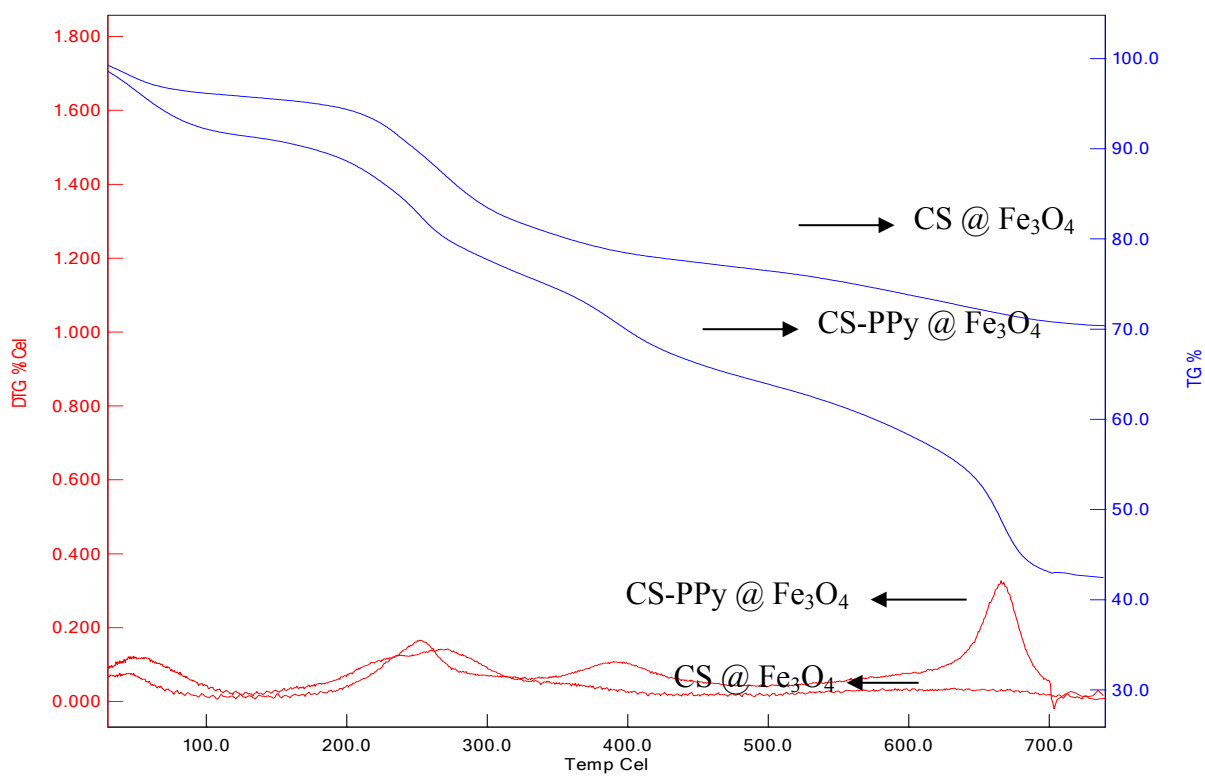

**Fig. S3** The TG/DTG curves of CS @ Fe<sub>3</sub>O<sub>4</sub> and CS-PPy @ Fe<sub>3</sub>O<sub>4</sub> magnetic nanocomposite

59  
60  
61  
62  
63  
64  
65  
66

67 **Table S1**

68 The retention times, precursor ion, product ion and collision energy for identification and  
69 quantitation of macrolides using the multiple reaction monitoring (MRM) mode.

---

| Analyte | Retention time<br>(min) | Precursor ion (m/z) | Product ion (m/z) | Collision energy (V) | Fragmen tor (V) | Dwell time (ms) |
|---------|-------------------------|---------------------|-------------------|----------------------|-----------------|-----------------|
| AZI     | 1.796                   | 749.1               | 591.3             | 28                   | 160             | 30              |
|         |                         |                     | 158               | 44                   |                 | 30              |
| ROX     | 3.465                   | 837.6               | 679.5             | 20                   | 140             | 30              |
|         |                         |                     | 158.4             | 10                   |                 | 30              |
| CLA     | 3.4                     | 748.9               | 158.6             | 30                   | 140             | 30              |
|         |                         |                     | 116.5             | 45                   |                 | 30              |
| TYL     | 2.986                   | 916.2               | 772.2             | 28                   | 160             | 30              |
|         |                         |                     | 173.9             | 41                   |                 | 30              |

---

70  
71  
72  
73
